# Supplementary material for: Whole mitochondrial genomes unveil the impact of domestication on goat matrilineal variability
Source: PubMed Central journal article supplement (PMC4696231; doi:10.1186/s12864-015-2342-2), 2015-12-29
Supplement: 12864_2015_2342_MOESM2_ESM.pdf [file 12864_2015_2342_MOESM2_ESM.pdf]

**Table S5.** Goat haplogroup frequencies based on modern and ancient control-region mtDNA data.<sup>a</sup>

| Domestic Breeds            |                               |                              |                              |                             |                              |                            |                             |             |                                                                                                                                                                                                                                                                                                                                                                                                               |
|----------------------------|-------------------------------|------------------------------|------------------------------|-----------------------------|------------------------------|----------------------------|-----------------------------|-------------|---------------------------------------------------------------------------------------------------------------------------------------------------------------------------------------------------------------------------------------------------------------------------------------------------------------------------------------------------------------------------------------------------------------|
|                            | Hg A                          | Hg B                         | Hg C                         | Hg D                        | Hg F                         | Hg G                       | Other                       | Total       | References                                                                                                                                                                                                                                                                                                                                                                                                    |
| <b>Africa</b>              | <b>574</b><br><b>(95.19)</b>  | <b>14 (2.32)</b>             | ...                          | ...                         | ...                          | <b>15</b><br><b>(2.49)</b> | ...                         | <b>603</b>  |                                                                                                                                                                                                                                                                                                                                                                                                               |
| Northern                   | 383<br>(98.97)                | ...                          | ...                          | ...                         | ...                          | 4<br>(1.03)                | ...                         | 387         | Amills Direct subm; Benjelloun Direct subm; Daga Direct subm; [1]; [2]; [3]; This Study                                                                                                                                                                                                                                                                                                                       |
| Central                    | 102<br>(90.27)                | ...                          | ...                          | ...                         | ...                          | 11<br>(9.73)               | ...                         | 113         | [4]; Amills Direct subm; Githui Direct subm; [1]; [2]; [5]                                                                                                                                                                                                                                                                                                                                                    |
| Southern                   | 89<br>(86.41)                 | 14<br>(13.59)                | ...                          | ...                         | ...                          | ...                        | ...                         | 103         | Awotunde Direct subm; [1]; [2]; Wu and Liu Direct subm                                                                                                                                                                                                                                                                                                                                                        |
| <b>America</b>             | <b>64</b><br><b>(100.00)</b>  | ...                          | ...                          | ...                         | ...                          | ...                        | ...                         | <b>64</b>   |                                                                                                                                                                                                                                                                                                                                                                                                               |
| Central                    | 34<br>(100.00)                | ...                          | ...                          | ...                         | ...                          | ...                        | ...                         | 34          | [4]; Marcheco Direct subm                                                                                                                                                                                                                                                                                                                                                                                     |
| Southern                   | 30<br>(100.00)                | ...                          | ...                          | ...                         | ...                          | ...                        | ...                         | 30          | [4]                                                                                                                                                                                                                                                                                                                                                                                                           |
| <b>Asia</b>                | <b>2891</b><br><b>(84.93)</b> | <b>392</b><br><b>(11.52)</b> | <b>43</b><br><b>(1.26)</b>   | <b>34</b><br><b>(1.00)</b>  | ...                          | <b>44</b><br><b>(1.29)</b> | ...                         | <b>3404</b> |                                                                                                                                                                                                                                                                                                                                                                                                               |
| Middle East                | 876<br>(93.99)                | 6 (0.64)                     | 2 (0.21)                     | 8 (0.86)                    | ...                          | 40<br>(4.29)               | ...                         | 932         | [6]; Akis Direct subm; Mazdarani Direct subm; Kiraz Direct subm; [1]; [2]; This Study; Wu and Liu Direct subm                                                                                                                                                                                                                                                                                                 |
| Southern                   | 830<br>(94.10)                | 31 (3.51)                    | 9 (1.02)                     | 11<br>(1.25)                | ...                          | 1<br>(0.11)                | ...                         | 882         | Amills Direct subm; Das Direct sub; Jimcy Direct subm; [7]; Karabasanavar Direct subm; [1]; [2]; Nomura et al Direct subm; Rana Direct subm; Sadia Direct subm; [8]; [9]; This Study                                                                                                                                                                                                                          |
| Eastern                    | 1185<br>(74.53)               | 355<br>(22.33)               | 32<br>(2.01)                 | 15<br>(0.94)                | ...                          | 3<br>(0.19)                | ...                         | 1590        | Cai Direct subm; Chen and Wang Direct subm; [10]; Chi Direct subm; Fang Direct subm; Kim Direct subm; Li Direct subm; [11]; [12]; [13]; Liu Direct subm; [1]; [14]; Mannen Direct subm; [2]; Nomura et al Direct subm; Song and Lin Direct subm; Tang Direct subm; This Study; [15]; Wu and Liu Direct subm; Wu and Ma Direct subm; [16]; Xi Direct subm; Zhang Direct subm; [17]; Zhong and Wang Direct subm |
| <b>Europe</b>              | <b>2148</b><br><b>(97.59)</b> | <b>2 (0.09)</b>              | <b>45</b><br><b>(2.04)</b>   | <b>3 (0.14)</b>             | <b>3 (0.14)</b>              | ...                        | ...                         | <b>2201</b> |                                                                                                                                                                                                                                                                                                                                                                                                               |
| Continental                | 504<br>(95.27)                | 1 (0.19)                     | 23<br>(4.35)                 | 1 (0.19)                    | ...                          | ...                        | ...                         | 529         | Amills Direct subm; Baldursdottir Direct subm; [18]; Daga Direct subm; [19]; [1]; Maudet and Taberlet Direct subm; [2]; [20]; This Study                                                                                                                                                                                                                                                                      |
| Mediterranean              | 1644<br>(98.33)               | 1 (0.06)                     | 22<br>(1.32)                 | 2 (0.12)                    | 3 (0.18)                     | ...                        | ...                         | 1672        | [4]; Amills Direct subm; [21]; Bigi Direct subm; Curik Direct subm; Daga Direct subm; [22]; Hughes Direct subm; [23]; [2]; [24]; [25]; [5]; [26]; This Study                                                                                                                                                                                                                                                  |
| <b>Total</b>               | <b>5677</b><br><b>(90.51)</b> | <b>408</b><br><b>(6.51)</b>  | <b>88</b><br><b>(1.40)</b>   | <b>37</b><br><b>(0.59)</b>  | <b>3 (0.05)</b>              | <b>59</b><br><b>(0.94)</b> | ...                         | <b>6272</b> |                                                                                                                                                                                                                                                                                                                                                                                                               |
| Wild Goats                 |                               |                              |                              |                             |                              |                            |                             |             |                                                                                                                                                                                                                                                                                                                                                                                                               |
|                            | Hg A                          | Hg B                         | Hg C                         | Hg D                        | Hg F                         | Hg G                       | Other                       | Total       | References                                                                                                                                                                                                                                                                                                                                                                                                    |
| Middle East                | 29 (6.35)                     | 17 (3.72)                    | 171<br>(37.42)               | 59<br>(12.91)               | 132<br>(28.88)               | 10<br>(2.19)               | 39<br>(8.53)                | 457         | [1]; [27]; This Study                                                                                                                                                                                                                                                                                                                                                                                         |
| Southern Asia              | ...                           | ...                          | 14<br>(42.42)                | ...                         | 6<br>(18.18)                 | ...                        | 13<br>(39.39)               | 33          | [1]; [27]; [9]                                                                                                                                                                                                                                                                                                                                                                                                |
| Mediterranean Europe       | 4<br>(100.00)                 | ...                          | ...                          | ...                         | ...                          | ...                        | ...                         | 4           | This Study                                                                                                                                                                                                                                                                                                                                                                                                    |
| <b>Total</b>               | <b>33 (6.68)</b>              | <b>17 (3.44)</b>             | <b>185</b><br><b>(37.45)</b> | <b>59</b><br><b>(11.94)</b> | <b>138</b><br><b>(27.94)</b> | <b>10</b><br><b>(2.02)</b> | <b>52</b><br><b>(10.53)</b> | <b>494</b>  |                                                                                                                                                                                                                                                                                                                                                                                                               |
| Ancient Goats <sup>b</sup> |                               |                              |                              |                             |                              |                            |                             |             |                                                                                                                                                                                                                                                                                                                                                                                                               |
|                            | Hg A                          | Hg B                         | Hg C                         | Hg D                        | Hg F                         | Hg G                       | Other                       | Total       | References                                                                                                                                                                                                                                                                                                                                                                                                    |
| <b>Asia</b>                | <b>22</b><br><b>(88.00)</b>   | <b>2 (8.00)</b>              | ...                          | <b>1 (4.00)</b>             | ...                          | ...                        | ...                         | <b>25</b>   |                                                                                                                                                                                                                                                                                                                                                                                                               |
| Middle East                | 15<br>(100.00)                | ...                          | ...                          | ...                         | ...                          | ...                        | ...                         | 15          | [6]; [28]; [29]; [30]; [31]                                                                                                                                                                                                                                                                                                                                                                                   |
| Eastern                    | 7 (70.00)                     | 2 (20.00)                    | ...                          | 1<br>(10.00)                | ...                          | ...                        | ...                         | 10          | [32]                                                                                                                                                                                                                                                                                                                                                                                                          |
| <b>Europe</b>              | <b>23</b><br><b>(88.46)</b>   | <b>1 (3.85)</b>              | <b>2 (7.69)</b>              | ...                         | ...                          | ...                        | ...                         | <b>26</b>   |                                                                                                                                                                                                                                                                                                                                                                                                               |
| Continental                | ...                           | 1<br>(100.00)                | ...                          | ...                         | ...                          | ...                        | ...                         | 1           | [20]                                                                                                                                                                                                                                                                                                                                                                                                          |
| Mediterranean              | 23<br>(92.00)                 | ...                          | 2 (8.00)                     | ...                         | ...                          | ...                        | ...                         | 25          | [19]; [33]; [34]                                                                                                                                                                                                                                                                                                                                                                                              |
| <b>Total</b>               | <b>45</b><br><b>(88.24)</b>   | <b>3 (5.88)</b>              | <b>2 (3.92)</b>              | <b>1 (1.96)</b>             | ...                          | ...                        | ...                         | <b>51</b>   |                                                                                                                                                                                                                                                                                                                                                                                                               |

<sup>a</sup> Haplogroup frequencies (%) are in parentheses. Sequences with an ambiguous haplogroup affiliation and/or geographic origin were not included.

<sup>b</sup> Sequences reported by [18] were excluded due to their ambiguity: i) haplogroup affiliation was unclear, sequences did not match with known haplogroups probably because data derived from ancient parchments represent multiple individuals/species due to the complex stages of parchment manufacturing, ii) the geographic origin of the individuals may not match the location where the parchments have been stored.

**Table S6.** Diagnostic mutational motifs of goat mtDNA haplogroups and sub-haplogroups.

| Clade                     | Diagnostic Coding Region Mutational Motif <sup>a,b</sup>                                                                                                                                                                                                                                                                                                                                                                                                                                                                                                                                                                                                                                                                                                                                                                                                                                                                                                           |
|---------------------------|--------------------------------------------------------------------------------------------------------------------------------------------------------------------------------------------------------------------------------------------------------------------------------------------------------------------------------------------------------------------------------------------------------------------------------------------------------------------------------------------------------------------------------------------------------------------------------------------------------------------------------------------------------------------------------------------------------------------------------------------------------------------------------------------------------------------------------------------------------------------------------------------------------------------------------------------------------------------|
| <b>A</b>                  | 3194, 7839, 8055, <u>14746</u>                                                                                                                                                                                                                                                                                                                                                                                                                                                                                                                                                                                                                                                                                                                                                                                                                                                                                                                                     |
| <b>A1</b>                 | 6186                                                                                                                                                                                                                                                                                                                                                                                                                                                                                                                                                                                                                                                                                                                                                                                                                                                                                                                                                               |
| <b>A1a</b>                | <u>9220</u>                                                                                                                                                                                                                                                                                                                                                                                                                                                                                                                                                                                                                                                                                                                                                                                                                                                                                                                                                        |
| <b>A2</b>                 | 194                                                                                                                                                                                                                                                                                                                                                                                                                                                                                                                                                                                                                                                                                                                                                                                                                                                                                                                                                                |
| <b>A2a</b>                | 7213                                                                                                                                                                                                                                                                                                                                                                                                                                                                                                                                                                                                                                                                                                                                                                                                                                                                                                                                                               |
| <b>A2a1</b>               | <u>7117</u>                                                                                                                                                                                                                                                                                                                                                                                                                                                                                                                                                                                                                                                                                                                                                                                                                                                                                                                                                        |
| <b>A3</b>                 | 4332, 10944                                                                                                                                                                                                                                                                                                                                                                                                                                                                                                                                                                                                                                                                                                                                                                                                                                                                                                                                                        |
| <b>A4</b>                 | 4191                                                                                                                                                                                                                                                                                                                                                                                                                                                                                                                                                                                                                                                                                                                                                                                                                                                                                                                                                               |
| <b>A5</b>                 | <u>6863</u>                                                                                                                                                                                                                                                                                                                                                                                                                                                                                                                                                                                                                                                                                                                                                                                                                                                                                                                                                        |
| <b>A6</b>                 | 11127                                                                                                                                                                                                                                                                                                                                                                                                                                                                                                                                                                                                                                                                                                                                                                                                                                                                                                                                                              |
| <b>A7</b>                 | 8279, 11913                                                                                                                                                                                                                                                                                                                                                                                                                                                                                                                                                                                                                                                                                                                                                                                                                                                                                                                                                        |
| <b>B</b>                  | 6096, 7342, 8635, 9010, 10813, 11702, 11872, 13178, 13286, 13681, 13762                                                                                                                                                                                                                                                                                                                                                                                                                                                                                                                                                                                                                                                                                                                                                                                                                                                                                            |
| <b>B1</b>                 | 2849, 8703, 13964, 14461, 14795                                                                                                                                                                                                                                                                                                                                                                                                                                                                                                                                                                                                                                                                                                                                                                                                                                                                                                                                    |
| <b>C</b>                  | 1024, <u>1112</u> , 1368, 4626, 8113, 8486, 9547, 9599, 10106, 10302, 10545, 10563, 10950, 11073, 11256, 11569, 11957, 12146, <u>12362</u> , <u>12638</u> , 13157, <u>15053</u>                                                                                                                                                                                                                                                                                                                                                                                                                                                                                                                                                                                                                                                                                                                                                                                    |
| <b>C1</b>                 | 165, 3599, 4569, 4707, 6390, <u>6537</u> , 7657, 8300C, <u>8851</u> , 9111, 9205, <u>9346</u> , 11969, 12539, 12791, 14290, 14527                                                                                                                                                                                                                                                                                                                                                                                                                                                                                                                                                                                                                                                                                                                                                                                                                                  |
| <b>C1a</b>                | 1191, 5775, <u>6324</u> , <u>7117</u> , 9061, 12386, <u>12626</u>                                                                                                                                                                                                                                                                                                                                                                                                                                                                                                                                                                                                                                                                                                                                                                                                                                                                                                  |
| <b>D</b>                  | <u>4276</u> , 7090, 7108, 8968, 11325                                                                                                                                                                                                                                                                                                                                                                                                                                                                                                                                                                                                                                                                                                                                                                                                                                                                                                                              |
| <b>D1</b>                 | 2698, 3739, 6333G, 7324, 7463, 7910, 8474, 10001, <u>12014</u> , 12242, 13293, 13894, <u>14317</u> , 14500, <u>15238</u>                                                                                                                                                                                                                                                                                                                                                                                                                                                                                                                                                                                                                                                                                                                                                                                                                                           |
| <b>A'B'D'G</b>            | 203, 4032, 7052, 7660, 7885, 8480, 8730, 8818, 10479, <u>10686</u> , 11364, 11691, 13100T, 13280, 15220                                                                                                                                                                                                                                                                                                                                                                                                                                                                                                                                                                                                                                                                                                                                                                                                                                                            |
| <b>A'D'G</b>              | 1849, 5601, 8078, 8959, <u>9826</u> , 13741                                                                                                                                                                                                                                                                                                                                                                                                                                                                                                                                                                                                                                                                                                                                                                                                                                                                                                                        |
| <b>A'D</b>                | 2207, 3468, 10638, <u>12383</u> , 13756, 15004                                                                                                                                                                                                                                                                                                                                                                                                                                                                                                                                                                                                                                                                                                                                                                                                                                                                                                                     |
| <b>A'B'C'D'G</b>          | 211, 2885C, 3002, 3131, 3293, <u>3770</u> , 4713, 4890, 5712, 6093, 6414, 8264, 9994, 10356A, 10449, 12314, 13001, 13292, <u>13502</u> , <u>14044</u> , 14386, <u>14518</u>                                                                                                                                                                                                                                                                                                                                                                                                                                                                                                                                                                                                                                                                                                                                                                                        |
| <b>G</b>                  | <u>257</u> , 726, 797, 3197, 3949, <u>4119</u> , 8102, 8770, 9546, 11649, <u>12014</u> , 12743, 14288, <u>14587</u> , 15007, 15112                                                                                                                                                                                                                                                                                                                                                                                                                                                                                                                                                                                                                                                                                                                                                                                                                                 |
| <b>A.G.M.<sup>c</sup></b> | 56, 100, 227, <u>289</u> , 435, 945, 1075, 1829, 2268, 2311, 2663, 2922, 2978, 3248, 3261, 3491, 3635, 3960T, 4131, 4164, <u>4284</u> , <u>4363</u> , 4470, 4563, 4601A, 4749, 5085, 5141, <u>5312</u> , 5658, 5772, 5791, 5850, 6150, 6309, 6486, 6528, 6923, 7024, 7151, 7318, 7361, 7426, 7642, <u>7669</u> , 7842, 8456, <u>8597</u> , 8668, 8758, 8827, 9007, 9085, 9086, 9139, 9223, 9297, <u>9346</u> , 9445, 9470, 9572, 9677, 9753, 9797, 9935, 9937, 9943, 10229, 10261, <u>10374</u> , 10416, 10430, <u>10440</u> , 10473, 10557, 10776, 10842, 11001, 11052, 11163, 11797, 11849, 11912, 11915, 11973, 12044, 12218, 12257, 12260, 12369, 12651, 12683, 12762, 12776, 12987, 13146A, 13271, 13382, 13457, 13508, <u>13523</u> , 13526, 13548, 13579, 13675, 13800, 14038, 14050, 14170, 14266C, 14284, 14341, 14444, 14524, 14593, <u>14650</u> , 14674, 14686, 14720, <u>14746</u> , 14767C, 14893, <u>14968</u> , 14993, <u>15053</u> , 15076, 15348 |

<sup>a</sup> Coding Region Mutational motifs are relative to the reference sequence (GRS, GenBank NC\_005044.2), which is a member of haplogroup B.

<sup>b</sup> Recurrent mutations are underlined.

<sup>c</sup> Ancestral Goat Mitogenome.

**Table S7.** A comparison of the phylogeographic features of goat, taurine and horse mtDNA haplogroups identified by analyzing domestic breeds from Eurasia.

| Goat <sup>a</sup><br><i>C. hircus</i>    |       |       | Taurine Cattle <sup>b</sup><br><i>B. taurus</i> |       |         | Horse <sup>c</sup><br><i>E. caballus</i> |       |           |
|------------------------------------------|-------|-------|-------------------------------------------------|-------|---------|------------------------------------------|-------|-----------|
| Hg                                       | Age   | Freq  | Hg                                              | Age   | Freq    | Hg                                       | Age   | Freq      |
| ABCDG<br>( <i>A.d.G.M</i> ) <sup>d</sup> | 136.7 |       | REPQT<br>( <i>A.T.M.</i> ) <sup>e</sup>         | 135.3 |         | A-R<br>( <i>A.M.M</i> ) <sup>f</sup>     | 152.6 |           |
| A                                        | 12.8  | 89.9% | Q1                                              | 15.5  | 0.8%(Q) | A                                        | 3.2   | 6.6%      |
| B1                                       | 14.2  | 7.0%  | Q2                                              | 0.9   | n.a.    | B                                        | 7.1   | 8.2%      |
| C1a                                      | 9.2   | 1.6%  | R1                                              | 3.0   | 0.6%(R) | C                                        | 4.6   | 1.4%      |
| D1                                       | n.a.  | 0.7%  | R2                                              | n.a.  | n.a.    | D                                        | n.a.  | 3.6%      |
| G                                        | 9.0   | 0.8%  | T1                                              | 9.4   | 5.8%    | E                                        | n.a.  | 0.9%      |
|                                          |       |       | T2                                              | 10.4  | 5.1%    | G                                        | 6.6   | 10.3%     |
|                                          |       |       | T3                                              | 11.3  | 85.5%   | H                                        | n.a.  | 1.0%      |
|                                          |       |       | T5                                              | 10.2  | 0.7%    | I                                        | 10.6  | 7.4%      |
|                                          |       |       |                                                 |       |         | J                                        | 11.2  | 2.4%(J/K) |
|                                          |       |       |                                                 |       |         | K                                        | n.a.  | n.a.      |
|                                          |       |       |                                                 |       |         | L                                        | 6.4   | 31.9%     |
|                                          |       |       |                                                 |       |         | M                                        | 4.1   | 5.9%      |
|                                          |       |       |                                                 |       |         | N                                        | 4.3   | 6.3%      |
|                                          |       |       |                                                 |       |         | O                                        | n.a.  | n.a.      |
|                                          |       |       |                                                 |       |         | P                                        | 4.5   | 3.5%(O/P) |
|                                          |       |       |                                                 |       |         | Q                                        | 10.1  | 6.9%      |
|                                          |       |       |                                                 |       |         | R                                        | 3.0   | 1.9%      |

<sup>a</sup> Percentage frequencies among Eurasian domestic goats and age estimates are from this study.

<sup>b</sup> Percentage frequencies among domestic taurine breeds in Eurasia are from [35], except for Q, R and T5 [36]. ML age estimates (based on coding-region substitutions) are from [37], except for Q1, Q2 and R1 [36].

<sup>c</sup> Percentage frequencies and ML age estimates (based on synonymous substitutions) are from [38].

<sup>d</sup> Ancestral domestic Goat Mitogenome.

<sup>e</sup> Ancestral Taurine Mitogenome.

<sup>f</sup> Ancestral Mare Mitogenome.

**Table S8.** Oligonucleotides used to amplify and sequence (Sanger method) the goat mitochondrial genome.

| PCR ID Number | Fragment Length (bps) | Oligonucleotide for PCR |                              |                     | Oligonucleotide for sequencing |                          |                     |
|---------------|-----------------------|-------------------------|------------------------------|---------------------|--------------------------------|--------------------------|---------------------|
|               |                       | Name <sup>a</sup>       | Sequence (5'→3')             | T <sub>m</sub> (°C) | Name <sup>a</sup>              | Sequence (5'→3')         | T <sub>m</sub> (°C) |
| 1             | 1884                  | 16539F                  | GCTCCCTCCTAGATATTAGTGCAA     | 59.47               | 16614F                         | TAAGTGCCTGGGTCTTTTAC     | 54.97               |
|               |                       | 1779R                   | GACTTAAACTTGTGCAGGGAGAAA     | 59.42               | 486F                           | CTGGGATTAGATACCCCACT     | 55.37               |
| 2             | 1891                  | 1601F                   | AGGCCTAAAAGCAGCCATC          | 57.80               | 1777R                          | CTTAAACTTGTGCAGGGAGA     | 55.28               |
|               |                       | 3491R                   | ATAGGGGCTGTGAAATGCTC         | 57.64               | 1685F                          | CCTAGACCTAATACTGGACCAC   | 56.79               |
| 3             | 1868                  | 3128F                   | CATTGGAGCCTTACGAGCAG         | 58.71               | 2073F                          | CACGAGGGTTTTACTGTCTC     | 55.82               |
|               |                       | 4995R                   | CTTGCTTAGGGCTTTGAAGG         | 56.69               | 2633F                          | TACAAACAAAACCTGCCCTA     | 54.76               |
| 4             | 1907                  | 4670F                   | CCCCACTATCAGGATTTGTACC       | 57.91               | 3217F                          | CCTTCGCCCTCTCTACACTA     | 57.95               |
|               |                       | 6576R                   | AATTGCGAAGTGGATTTTGG         | 55.13               | 3793F                          | AAGAACCFAAACTCTTCGT      | 55.11               |
| 5             | 1858                  | 6221F                   | ACGTCGATACACGGGCTTAC         | 59.90               | 4261F                          | ACACAAGGTATCCCCTATC      | 55.68               |
|               |                       | 8078R                   | GAGTGCCCATTTGTGGAGAG         | 58.54               | 4736F                          | TCTTACCCACCTTATAGCA      | 54.94               |
| 6             | 1765                  | 7772F                   | TGCCACAACCTAGACACATCG        | 57.92               | 5253F                          | CAGGACTTGGTAAAAAGAGG     | 53.51               |
|               |                       | 9536R                   | GGGGAGTCAAAATGCGATAG         | 56.29               | 5776F                          | CTACACCTAGCAGGCATCTC     | 57.19               |
| 7             | 1834                  | 9208F                   | CACAGGATTCCACGGTCTTC         | 58.27               | 6313F                          | GGAGGCAATATCAAATGGT      | 52.58               |
|               |                       | 11041R                  | TGACGGAAGAATATGCGATG         | 55.74               | 6840F                          | ATTTGAAGAACCACATACG      | 53.60               |
| 8             | 1769                  | 10725F                  | ACCCAACCTCTGATCCAATG         | 57.19               | 7401F                          | AACCTGGAGAACTACGACTG     | 56.60               |
|               |                       | 12493R                  | GAGTGGAGTAATGCTGAAACGG       | 59.33               | 7864F                          | GACTTCTACCACAACCCAGA     | 56.48               |
| 9             | 1923                  | 12123F                  | ATCACAATACTCATCTCGTCACC      | 60.20               | 8334F                          | CCACTAATCCCAATGCTAGT     | 54.50               |
|               |                       | 14045R                  | TCTTTGTAATAGGTTTTGTGGGGT     | 58.29               | 8806F                          | CTTCCAAGGTCATCATACTCC    | 55.47               |
| 10            | 1871                  | 13797F                  | TAACAAACGCCCTAGAACAA         | 57.51               | 9288F                          | TCACCTCTAATCATCACTTCG    | 54.88               |
|               |                       | 15667R                  | GTAGGCGAGCGGTGTAATGTA        | 59.93               | 9773F                          | CGAATGAACCTCAAAAAGGAC    | 52.83               |
| 11            | 1634                  | 15177F                  | CAGTCGAACATCCCTACATTATTATTGG | 60.12               | 10332F                         | CTTCTTCTCCGACTCCCTAT     | 55.46               |
|               |                       | 00167R                  | TTAGTCTTATTGATTTGGAGGGCGTTA  | 60.58               | 10814F                         | TACCTAAAGCCACGTAGAA      | 55.59               |
|               |                       |                         |                              |                     | 11258F                         | TAACCTAATCTGGCCCTACCC    | 55.69               |
|               |                       |                         |                              |                     | 11826F                         | TACAAATCCACCAACTACCC     | 54.64               |
|               |                       |                         |                              |                     | 12215F                         | ATGGTGATATGGACGAACAG     | 54.94               |
|               |                       |                         |                              |                     | 12709F                         | AACCTACCTAGCATTCTC       | 56.00               |
|               |                       |                         |                              |                     | 13252F                         | TAGAAACCGCTAACATAACTCA   | 54.96               |
|               |                       |                         |                              |                     | 13852F                         | AGTAGCCATAGCCGTCGTATAACC | 61.87               |
|               |                       |                         |                              |                     | 14221F                         | CCCATCAAACATCTCATCAT     | 52.99               |
|               |                       |                         |                              |                     | 14779F                         | AGGAATTCCATCAGACGCAG     | 57.68               |
|               |                       |                         |                              |                     | 15306F                         | TACAATCAATACACTGGTCTT    | 52.18               |
|               |                       |                         |                              |                     | 15935F                         | ATTAAACGATCTCCCCCAT      | 53.07               |

<sup>a</sup>Primer names correspond to the (5') nucleotide position in GRS.

## Supporting references (*in extenso*):

1. Luikart G, Gielly L, Excoffier L, Vigne JD, Bouvet J, Taberlet P: **Multiple maternal origins and weak phylogeographic structure in domestic goats.** *Proc Natl Acad Sci U S A* 2001, **98**(10):5927-5932.
2. Naderi S, Rezaei HR, Taberlet P, Zundel S, Rafat SA, Naghash HR, el-Barody MA, Ertugrul O, Pompanon F, Consortium E: **Large-scale mitochondrial DNA analysis of the domestic goat reveals six haplogroups with high diversity.** *PLoS One* 2007, **2**(10):e1012.
3. Pereira F, Queirós S, Gusmão L, Nijman IJ, Cuppen E, Lenstra JA, Davis SJ, Nejmeddine F, Amorim A, Consortium E: **Tracing the history of goat pastoralism: new clues from mitochondrial and Y chromosome DNA in North Africa.** *Mol Biol Evol* 2009, **26**(12):2765-2773.
4. Amills M, Ramírez O, Tomàs A, Badaoui B, Marmi J, Acosta J, Sánchez A, Capote J: **Mitochondrial DNA diversity and origins of South and Central American goats.** *Anim Genet* 2009, **40**(3):315-322.
5. Royo LJ, Traoré A, Tambourá HH, Alvarez I, Kaboré A, Fernández I, Ouédraogo-Sanou G, Toguyeni A, Sawadogo L, Goyache F: **Analysis of mitochondrial DNA diversity in Burkina Faso populations confirms the maternal genetic homogeneity of the West African goat.** *Anim Genet* 2009, **40**(3):344-347.
6. Akis I, Oztabak K, Mengi A, Un C: **Mitochondrial DNA diversity of Anatolian indigenous domestic goats.** *J Anim Breed Genet* 2014, **131**(6):487-495.
7. Joshi MB, Rout PK, Mandal AK, Tyler-Smith C, Singh L, Thangaraj K: **Phylogeography and origin of Indian domestic goats.** *Mol Biol Evol* 2004, **21**(3):454-462.
8. Sultana S, Mannen H: **Polymorphism and evolutionary profile of mitochondrial DNA control region inferred from the sequences of Pakistani goats.** In: *Anim Sci J*. vol. 75; 2004: 303-309.
9. Sultana S, Mannen H, Tsuji S: **Mitochondrial DNA diversity of Pakistani goats.** *Anim Genet* 2003, **34**(6):417-421.
10. Chen SY, Su YH, Wu SF, Sha T, Zhang YP: **Mitochondrial diversity and phylogeographic structure of Chinese domestic goats.** *Mol Phylogenet Evol* 2005, **37**(3):804-814.
11. Lin BZ, Odahara S, Ishida M, Kato T, Sasazaki S, Nozawa K, Mannen H: **Molecular phylogeography and genetic diversity of East Asian goats.** *Anim Genet* 2013, **44**(1):79-85.
12. Liu RY, Yang GS, Lei CZ: **The genetic diversity of mtDNA D-loop and the origin of Chinese goats.** *Yi Chuan Xue Bao* 2006, **33**(5):420-428.
13. Liu YP, Cao SX, Chen SY, Yao YG, Liu TZ: **Genetic diversity of Chinese domestic goat based on the mitochondrial DNA sequence variation.** *J Anim Breed Genet* 2009, **126**(1):80-89.
14. Mannen H, Nagata Y, Tsuji S: **Mitochondrial DNA reveal that domestic goat (*Capra hircus*) are genetically affected by two subspecies of bezoar (*Capra aegagurus*).** *Biochem Genet* 2001, **39**(5-6):145-154.
15. Wang J, Chen YL, Wang XL, Yang ZX: **The genetic diversity of seven indigenous Chinese goat breeds.** *Small Rumin Res* 2008, **74**:231-237.
16. Wu YP, Guan WJ, Zhao QJ, He XH, Pu YB, Huo JH, Xie JF, Han JL, Rao SQ, Ma YH: **A fine map for maternal lineage analysis by mitochondrial hypervariable region in 12 Chinese goat breeds.** *Anim Sci J* 2009, **80**(4):372-380.
17. Zhao Y, Zhao R, Zhao Z, Xu H, Zhao E, Zhang J: **Genetic diversity and molecular phylogeography of Chinese domestic goats by large-scale mitochondrial DNA analysis.** *Mol Biol Rep* 2014, **41**(6):3695-3704.
18. Campana MG, Bower MA, Bailey MJ, Stock F, O'Connell TC, Edwards CJ, Checkley-Scott C, Knight B, Spencer M, Howe CJ: **A flock of sheep, goats and cattle: ancient DNA analysis reveals complexities of historical parchment manufacture.** *J Archaeol Sci* 2010, **37**(6):1317-1325.
19. Fernández H, Hughes S, Vigne JD, Helmer D, Hodgins G, Miquel C, Hänni C, Luikart G, Taberlet P: **Divergent mtDNA lineages of goats in an Early Neolithic site, far from the initial domestication areas.** *Proc Natl Acad Sci U S A* 2006, **103**(42):15375-15379.
20. Schlumbaum A, Campos PF, Volkenc S, Volkenc M, Hafner A, Schibler J: **Ancient DNA, a Neolithic legging from the Swiss Alps and the early history of goat.** *J Archaeol Sci* 2010, **37**(6):1247-1251.
21. Azor PJ, Monteagudo LV, Luque M, Tejedor MT, Rodero E, Sierra I, Herrera M, Rodero A, Arruga MV: **Phylogenetic relationships among Spanish goats breeds.** *Anim Genet* 2005, **36**(5):423-425.
22. Doro MG, Piras D, Leoni GG, Casu G, Vaccargiu S, Parracciani D, Naitana S, Pirastu M, Novelletto A: **Phylogeny and patterns of diversity of goat mtDNA haplogroup A revealed by resequencing complete mitogenomes.** *PLoS One* 2014, **9**(4):e95969.
23. Martinez A, Ferrando A, Manunza A, Gomez M, Landi V, Jordana J, Capote J, Badaoui B, Vidal O, Delgado JV *et al*: **Inferring the demographic history of a highly endangered goat breed through the analysis of nuclear and mitochondrial genetic signatures.** *Small Rumin Res* 2012, **104**(1-3):78-84.
24. Pereira F, Pereira L, Van Asch B, Bradley DG, Amorim A: **The mtDNA catalogue of all Portuguese autochthonous goat (*Capra hircus*) breeds: high diversity of female lineages at the western fringe of European distribution.** *Mol Ecol* 2005, **14**(8):2313-2318.
25. Piras D, Doro MG, Casu G, Melis PM, Vaccargiu S, Piras I, Parracciani D, Stradoni R, Frongia B, Lai G *et al*: **Haplotype affinities resolve a major component of goat (*Capra hircus*) MtdNA D-loop diversity and reveal specific features of the Sardinian stock.** *PLoS One* 2012, **7**(2):e30785.
26. Sardina MT, Ballester M, Marmi J, Finocchiaro R, van Kaam JB, Portolano B, Folch JM: **Phylogenetic analysis of Sicilian goats reveals a new mtDNA lineage.** *Anim Genet* 2006, **37**(4):376-378.
27. Naderi S, Rezaei HR, Pompanon F, Blum MG, Negrini R, Naghash HR, Balkiz O, Mashkour M, Gaggiotti OE, Ajmone-Marsan P *et al*: **The goat domestication process inferred from large-scale mitochondrial DNA analysis of wild and domestic individuals.** *Proc Natl Acad Sci U S A* 2008, **105**(46):17659-17664.
28. Kahila Bar-Gal G, Ducos P, Kolska Horwitz L: **The application of ancient DNA analysis to identify neolithic caprinae: a case study from the site of Hatoula, Israel.** *Int J Osteoarchaeol* 2003, **13**:120-131.
29. Fernández H, Taberlet P, Mashkour M, Vigne JD, Luikart G: **Assessing the origin and diffusion of domestic goats using ancient DNA.** In: *The first steps of animal domestication*. Edited by Vigne J-D, Peters J, Helmer D. Oxford: Oxbow Books; 2005: 50-54.
30. Luikart G, Fernandez H, Mashkour M, England PR, Taberlet P: **Origins and Diffusion of Domestic Goats Inferred from DNA Markers Example Analyses of MtdNA, Y Chromosome, and Microsatellites.** In: *Documenting Domestication New genetic and archaeological paradigms*. Edited by Zeder MA, Bradley DG, Emshwiller E, Smith BD. Berkeley: University of California Press; 2006: 294-305.
31. Mazdarani FH, Akbari MT, Fard RMN, Hessari M, Pour KC: **Molecular identification of *Capra hircus* in east Chia Sabz, an Iranian pre-pottery Neolithic site, Central Zagros, based on mtDNA.** *J Anim Plant Sci* 2014, **24**(3):945-950.

32. Han L, Yu HX, Cai DW, Shi HL, Zhu H, Zhou H: **Mitochondrial DNA analysis provides new insight into the origins of Chinese domestic goat.** *Small Rumin Res* 2010, **90**:41–46.
33. Gerbault P, Powell A, Thomas MG: **Evaluating demographic models for goat domestication using mtDNA sequences.** *Anthropozoologica* 2012, **47**(2):65-78.
34. Hughes S, Fernández H, Cucchi T, Duffraisse M, Casabianca F, Istria D, Pompanon F, Vigne JD, Hänni C, Taberlet P: **A dig into the past mitochondrial diversity of Corsican goats reveals the influence of secular herding practices.** *PLoS One* 2012, **7**(1):e30272.
35. Lenstra J, Ajmone-Marsan P, Beja-Pereira A, Bollongino R, Bradley D, Colli L, De Gaetano A, Edwards C, Felius M, Ferretti L *et al*: **Meta-Analysis of Mitochondrial DNA Reveals Several Population Bottlenecks during Worldwide Migrations of Cattle.** *Diversity* 2014, **6**(1):178.
36. Bonfiglio S, Achilli A, Olivieri A, Negrini R, Colli L, Liotta L, Ajmone-Marsan P, Torroni A, Ferretti L: **The enigmatic origin of bovine mtDNA haplogroup R: sporadic interbreeding or an independent event of *Bos primigenius* domestication in Italy?** *PLoS One* 2010, **5**(12):e15760.
37. Achilli A, Bonfiglio S, Olivieri A, Malusa A, Pala M, Kashani BH, Perego UA, Ajmone-Marsan P, Liotta L, Semino O *et al*: **The multifaceted origin of taurine cattle reflected by the mitochondrial genome.** *PLoS One* 2009, **4**(6):e5753.
38. Achilli A, Olivieri A, Soares P, Lancioni H, Hooshiar Kashani B, Perego UA, Nergadze SG, Carossa V, Santagostino M, Capomaccio S *et al*: **Mitochondrial genomes from modern horses reveal the major haplogroups that underwent domestication.** *Proc Natl Acad Sci U S A* 2012, **109**(7):2449-2454.
